# Supplementary material for: Fungal mycelia and bacterial thiamine establish a mutualistic growth mechanism
Source: Life Sci Alliance. 2020 Sep 21;3(12):e202000878. doi: 10.26508/lsa.202000878 (PMC7574024; doi:10.26508/lsa.202000878)
Supplement: Supplementary file 12 [file LSA-2020-00878_TableS2.xlsx]

## Sheet: DOWN
Table S3. The down-regulated gene in co-culture with more than 8-fold
		RPKM
	FC (F_B / F)	Fungi	Fungi_Bacteria	Gene name	info
AN2319	-32.0006	85.1595	1.98758		Ortholog of A. niger CBS 513.88 : An14g04210, A. oryzae RIB40 : AO090010000485, Aspergillus wentii : Aspwe1_0041701, Aspergillus sydowii : Aspsy1_0039595 and Aspergillus terreus NIH2624 : ATET_07606
AN7159	-28.175	43.313	0.775167		Ortholog(s) have tripeptidyl-peptidase activity
AN4148	-26.2079	268.733	7.90449	xtrE	Putative xylose transporter; transcriptionally induced by growth on xylose
AN3427	-24.002	29.1589	0.254305		Ortholog(s) have nucleolus, preribosome localization
AN5770	-23.0256	46.7407	1.37691		Ortholog of A. fumigatus Af293 : Afu6g06610, A. niger CBS 513.88 : An18g06470, A. oryzae RIB40 : AO090003000036, Aspergillus wentii : Aspwe1_0038379 and Aspergillus sydowii : Aspsy1_0149748
AN6426	-21.3434	313.607	11.5163		Has domain(s) with predicted metallopeptidase activity
AN0092	-19.457	37.8854	1.26601		Putative methyltransferase with a predicted role in histidine metabolism
AN2578	-15.9923	109.689	5.22512		Has domain(s) with predicted peroxidase activity
AN7832	-15.4066	44.796	2.23677		Has domain(s) with predicted flavin adenine dinucleotide binding, oxidoreductase activity, acting on CH-OH group of donors activity and role in oxidation-reduction process
AN7711	-14.8147	49.3678	2.62415	ndxB	Putative nudix hydrolase
AN3928	-14.6929	3758.72	294.905	thiF	Putative thiazole synthase, enzyme of the thiamine biosynthesis pathway
AN8247	-14.5005	35.8959	1.79871		Ortholog(s) have role in maturation of 5.8S rRNA from tricistronic rRNA transcript (SSU-rRNA, 5.8S rRNA, LSU-rRNA), maturation of LSU-rRNA from tricistronic rRNA transcript (SSU-rRNA, 5.8S rRNA, LSU-rRNA)
AN9496	-13.6597	35.0924	1.885		Has domain(s) with predicted cholestenol delta-isomerase activity, role in sterol metabolic process and endoplasmic reticulum, integral component of membrane localization
AN6621	-13.5945	104	5.84067		Ortholog of A. nidulans FGSC A4 : AN7403, A. fumigatus Af293 : Afu8g01810, A. niger CBS 513.88 : An05g02280, A. oryzae RIB40 : AO090026000198 and Aspergillus wentii : Aspwe1_0151553, Aspwe1_0177691
AN3206	-13.3479	195.464	11.7049		Putative aryl-alcohol oxidase-related protein; protein expressed at decreased levels in a hapX mutant versus wild-type; transcript is induced by nitrate
AN0806	-12.6078	25.1436	1.32766		Ortholog(s) have role in single-species biofilm formation on inanimate substrate and cytosol, nucleus localization
AN5340	-11.9345	31.9241	1.95325		Ortholog(s) have role in endonucleolytic cleavage in 5'-ETS of tricistronic rRNA transcript (SSU-rRNA, 5.8S rRNA and LSU-rRNA), more
AN2292	-11.7259	27.762	1.70848		Ortholog(s) have role in maturation of SSU-rRNA from tricistronic rRNA transcript (SSU-rRNA, 5.8S rRNA, LSU-rRNA) and cytoplasm, nucleolus localization
AN0956	-11.687	35.7805	2.3316		Ortholog(s) have tRNA dihydrouridine synthase activity, role in tRNA modification and nucleus localization
AN9125	-11.6359	43.7298	2.92227		RNA polymerase III, subunit C34; locus contains the conserved upstream open reading frame (uORF) AN9125-uORF
AN3481	-10.7873	581.543	44.8818		Ortholog(s) have carbohydrate binding activity
AN1949	-10.7413	69.8442	5.02461		Ortholog(s) have ATP-dependent RNA helicase activity, RNA binding activity
AN4178	-10.4582	104.637	7.69203	myg1	UPF0160 domain-containing protein; intracellular; protein abundance decreased by menadione stress
AN5010	-10.4392	28.9558	2.05302		Ortholog(s) have role in cellular response to biotic stimulus, cellular response to starvation and filamentous growth of a population of unicellular organisms in response to biotic stimulus, more
AN2574	-10.4305	13.8284	0.511166		Has domain(s) with predicted UDP-N-acetylmuramate dehydrogenase activity, flavin adenine dinucleotide binding activity and role in oxidation-reduction process
AN5871	-10.3718	40.0868	2.97574		Ortholog(s) have rRNA (adenine) methyltransferase activity and role in rRNA methylation, ribosomal large subunit biogenesis
AN0946	-10.2153	51.8255	3.94506		Ortholog(s) have mRNA binding activity
AN4456	-10.0642	31.9393	2.43193		Ortholog(s) have role in cellular response to drug and small-subunit processome localization
AN4065	-9.8991	34.0438	2.66399		Ortholog of A. nidulans FGSC A4 : AN7503, A. fumigatus Af293 : Afu1g05410, Afu2g05420, A. niger CBS 513.88 : An11g09310, An18g04230 and A. oryzae RIB40 : AO090001000653, AO090009000402
AN7671	-9.58275	37.326	3.00491		Ortholog of A. fumigatus Af293 : Afu2g01440, A. niger CBS 513.88 : An03g05020, A. oryzae RIB40 : AO090701000815, Neosartorya fischeri NRRL 181 : NFIA_033740 and Aspergillus clavatus NRRL 1 : ACLA_093470
AN9406	-9.57959	18.4036	1.23278	trm1	Putative 2,N2-dimethylguanosine tRNA methyltransferase; mutants are self-sterile
AN7630	-9.57413	69.1978	5.50008		Ortholog(s) have unfolded protein binding activity, role in ribosomal large subunit assembly and cytosol, cytosolic ribosome, preribosome, large subunit precursor localization
AN6865	-9.31306	42.6146	3.51089		Ortholog of A. fumigatus Af293 : Afu5g13120, A. niger CBS 513.88 : An14g06020, A. oryzae RIB40 : AO090120000437, Aspergillus wentii : Aspwe1_0170850 and Aspergillus sydowii : Aspsy1_0144687
AN7142	-9.19267	207.655	18.6902	pacA	Putative secreted acid phosphatase with a predicted role in gluconic acid and gluconate metabolism
AN7177	-9.17788	134.801	11.6852		Ortholog of A. fumigatus Af293 : Afu4g03322, A. niger CBS 513.88 : An14g01990, A. oryzae RIB40 : AO090011000139, Aspergillus sydowii : Aspsy1_0052594 and Aspergillus terreus NIH2624 : ATET_02136
AN6934	-9.12395	15.1077	0.967488		Has domain(s) with predicted role in transmembrane transport and integral component of membrane localization
AN1524	-8.82824	158.816	14.3429		Putative methylenetetrahydrofolate dehydrogenase (NAD+) with a predicted role in one-carbon metabolism
AN5884	-8.6852	121.677	10.962	pyrF	Orotate phosphoribosyltransferase (OPRTase) that catalyzes the fifth step in pyrimidine biosynthesis
AN3573	-8.67602	20.6466	1.70657		Has domain(s) with predicted oxidoreductase activity, acting on the aldehyde or oxo group of donors, NAD or NADP as acceptor activity and role in oxidation-reduction process
AN0072	-8.65943	34.7314	3.08228		Putative pseudouridine synthase with a predicted role in pyrimidine metabolism
AN0259	-8.65864	40.1781	3.56392		Putative adenylate kinase with a predicted role in nucleotide salvage pathways
AN0272	-8.63293	16.1587	1.20252		Ortholog of A. fumigatus Af293 : Afu1g02880, A. niger CBS 513.88 : An01g05030, A. oryzae RIB40 : AO090005000779, Aspergillus wentii : Aspwe1_0025563 and Aspergillus sydowii : Aspsy1_0055099
AN0796	-8.62982	27.9558	2.51749		Has domain(s) with predicted role in rRNA processing and small-subunit processome localization
AN0204	-8.62626	16.9664	1.31151		Has domain(s) with predicted ATP binding, ATP-dependent helicase activity, nucleic acid binding activity
AN3706	-8.59137	2894.33	315.049		S. cerevisiae ortholog RPS10A has role in rRNA export from nucleus; palA-dependent expression independent of pH
AN5713	-8.57767	61.3798	5.44944	cct7	Putative chaperonin complex component, TCP-1 eta subunit; ortholog of S. cerevisiae Cct7p; expression reduced after exposure to farnesol
AN4102	-8.57233	49.2319	4.43874	bglA	Putative beta-glucosidase; induced by carbon starvation-induced autophagy
AN4346	-8.49092	102.483	9.29022		Has domain(s) with predicted nucleic acid binding, nucleotide binding activity
AN5702	-8.4141	52.9492	4.827		Ortholog(s) have role in ribosomal large subunit biogenesis, ribosomal small subunit biogenesis and cytosolic large ribosomal subunit, nucleolus localization
AN8799	-8.22844	13.9763	1.01055		Has domain(s) with predicted tRNA (adenine-N1-)-methyltransferase activity, role in tRNA methylation and tRNA (m1A) methyltransferase complex localization
AN7214	-8.22822	37.651	3.4909		Ortholog of A. nidulans FGSC A4 : AN8162, A. fumigatus Af293 : Afu5g01210, A. niger CBS 513.88 : An16g00660 and A. oryzae RIB40 : AO090102000383, AO090120000014, AO090001000406, AO090103000238
AN0173	-8.0886	14.2356	1.07999		Ortholog of A. niger CBS 513.88 : An01g02440, A. oryzae RIB40 : AO090026000850, Aspergillus wentii : Aspwe1_0442639, Aspergillus sydowii : Aspsy1_0027713 and Aspergillus terreus NIH2624 : ATET_07718
AN3176	-8.04495	18.3626	1.59886	spb4	ATP-dependent rRNA helicase
AN8009.2	-7.47156	9914.37	1315.89	nmt1	Ortholog of A. fumigatus nmt1 and S. cerevisiae THI13; repressed by starvation-induced autophagy; this locus is reported to contain an upstream open reading frame (uORF)	ANID_08009|ANIA_08009	ORF|Uncharacterized	ChrII_A_nidulans_FGSC_A4	Ortholog of A. fumigatus nmt1 and S. cerevisiae THI13; repressed by starvation-induced autophagy; this locus is reported to contain an upstream open reading frame (uORF)
